# Supplementary material for: Immunogenicity of Calvenza-03 EIV/EHV® Vaccine in Horses: Comparative In Vivo Study
Source: Vaccines (Basel). 2021 Feb 17;9(2):166. doi: 10.3390/vaccines9020166 (PMC7922102; doi:10.3390/vaccines9020166)
Supplement: Supplementary file 1 [file vaccines-09-00166-s001.xlsx]

## Sheet: Single radial hemolysis 
Mean Equine influenza virus specific zone of hemolysis in (mm2) single radial hemolysis assay
V1 - 0 day			V2 - 10 weeks
Group 1	Group 2		Group 1	Group 2
56.7163	33.1662		78.5	74.6241
67.1666	50.24		67.1666	78.5
63.585	25.9541		70.8462	63.585
53.4291	41.2616		50.24	70.8462
82.4741	17.7116		86.5463	47.1491
41.2616	35.7666		47.1491	78.5
47.1491	23.7462		78.5	53.4291
67.1666	17.7116		70.8462	17.7116
17.7116	25.9541		44.1562	67.1666
82.4741	25.9541		78.5	50.24
70.8462	19.625		86.5463	63.585
63.585	25.9541		82.4741	38.465
12.56	21.6366		33.1662	67.1666
63.585	44.1562		67.1666	70.8462
30.6641	28.26		28.26	122.656

## Sheet: Virus neutralization assay
Mean equine influenza virus specific neutralizing antibody titre in virus neutralization assay
V1 - 0 day			V2 - 10 weeks
Group 1	Group 2		Group 1	Group 2
905	640		2560	1545
1093	1810		1545	453
905	773		3620	1810
1810	640		905	1280
1810	1358		3620	1810
1545	1093		1810	3620
1810	679		3620	773
3620	386		3620	386
773	679		3620	453
3620	1093		2185	905
905	679		905	905
3090	386		3620	453
453	773		546	905
1093	773		905	1810
386	339		386	7241

## Sheet: ELISpot assay
Mean spot forming units in ELISpot assy
V1 - 0 day			V2 - 10 weeks
Group 1	Group 2		Group 1	Group 2
3.0303	35.2941		11.7647	22.2222
1.70213	15.942		0	100
0	0		14.2857	22.2222
0	0		150	0
0	10.5263		133.333	75
0	50		10.4167	0
2.5641	2.8169		75	0
0	0		0	17.6471
0	0		0	46.1538
23.0769	0		6.66667	3.77359
5.08475	0		39.7436	42.5
1.94175	1.20482		122.222	87.5
10.8333	0		38.0952	0
0	8.57143		0	42.8571
10	0		109.091	17.8571
